# Supplementary material for: Phylogenetic analyses reveal multiple new stem-boring Tetramesa taxa (Hymenoptera: Eurytomidae): implications for the biological control of invasive African grasses
Source: Springer Nature journal article supplement (doi:10.1007/s10526-023-10231-4), 2023-12-01
Supplement: MOESM6 [file 26501322]

## Sheet: File_S2_COI_samples
GenBank ID	Sequence_ID	Organism	country	host	collected_by	collection_date	sex	note	lat	lon
OQ302594	GFS_2021_00750	Eurytomidae	South Africa: Mkuze Bus stop, Mkuze	Eragrostis trichophora		2021	f		-27°37'19.20''	32°01'30.00''
OQ302595	Z01A	Tetramesa	Zimbabwe	Androgpogon gayanus		2022			-16°55'15.60''	30°48'46.80''
OQ302596	Z01B	Tetramesa	Zimbabwe	Androgpogon gayanus		2022			-16°55'15.60''	30°48'46.80''
OQ302597	GFS_2021_00805	Tetramesa sp. 8	South Africa: Khuleni Powerlines, Hluhluwe	Cynodon dactylon		2021	m		-28°01'58.80''	32°16'58.80''
OQ302598	GFS_PHI_1200F	Tetramesa sp. 2	South Africa: Phinda	Sporobolus pyramidalis		2021			-27°53'27.60''	32°12'36.00''
OQ302599	KCP_2021_00233	Tetramesa sp. 20	South Africa: Kombuisland farm, Marquard	Eragrostis planana		2022			-28°45'21.60''	27°33'28.80''
OQ302600	LMY_2022_00008	Tetramesa sp. 1	South Africa: East London	Sporobolus sp.			f		-32°42'14.40''	27°28'58.80''
OQ302601	LMY_2022_00090	Tetramesa sp. 1	South Africa: East London	Sporobolus sp.			f		-32°42'14.40''	27°28'58.80''
OQ302602	LMY_2022_00098	Tetramesa sp. 1	South Africa: East London	Sporobolus sp.			f		-32°42'14.40''	27°28'58.80''
OQ302603	LMY_2022_00108	Tetramesa sp. 1	South Africa: East London	Sporobolus sp.			f		-32°42'14.40''	27°28'58.80''
OQ302604	LMY_2022_00139	Tetramesa sp. 1	South Africa: East London	Panicum maximum			f		-32°42'14.40''	27°28'58.80''
OQ302605	LMY_2022_00152	Tetramesa sp. 1	South Africa: East London	Sporobolus sp.			f		-32°42'14.40''	27°28'58.80''
OQ302606	LMY_2022_00177	Tetramesa sp. 1	South Africa: East London	Panicum maximum			f		-32°42'14.40''	27°28'58.80''
OQ302607	LMY_2021_00289	Tetramesa sp. 5	South Africa	Eragrostis curvula					-30°20'49.20''	24°33'46.80''
OQ302608	LMY_2021_00282	Tetramesa sp. 5	South Africa	Eragrostis curvula					-30°20'49.20''	24°33'46.80''
OQ302609	LMY_2021_00231	Tetramesa sp. 5	South Africa	Eragrostis curvula					-30°20'49.20''	24°33'46.80''
OQ302610	LMY_2021_00220	Tetramesa sp. 4	South Africa	Eragrostis curvula					-30°20'49.20''	24°33'46.80''
OQ302611	LMY_2021_00197	Tetramesa sp. 4	South Africa	Eragrostis curvula					-30°20'49.20''	24°33'46.80''
OQ302612	GFS_PHI_1007	Tetramesa sp. 26	South Africa: Phinda	Eragrostis rigidior			f		-27°53'27.60''	32°12'36.00''
OQ302613	GFS_PHI_1028F	Tetramesa sp. 26	South Africa: Phinda	Eragrostis rigidior			f		-27°53'27.60''	32°12'36.00''
OQ302614	GFS_PHI_1052F	Eurytomidae	South Africa: Phinda	Eragrostis rigidior			f		-27°53'27.60''	32°12'36.00''
OQ302615	GFS_PHI_1078F	Eurytomidae	South Africa: Phinda	Eragrostis rigidior			f		-27°53'27.60''	32°12'36.00''
OQ302616	GFS_PHI_1080F	Tetramesa sp. 26	South Africa: Phinda	Eragrostis rigidior			f		-27°53'27.60''	32°12'36.00''
OQ302617	GFS_PHI_1096M	Tetramesa sp. 2	South Africa: Phinda	Sporobolus pyramidalis		2021	m		-27°53'27.60''	32°12'36.00''
OQ302618	GFS_PHI_1101M	Tetramesa sp. 1	South Africa: Phinda	Sporobolus pyramidalis		2021	m		-27°53'27.60''	32°12'36.00''
OQ302619	GFS_PHI_1132M	Tetramesa sp. 26	South Africa: Phinda	Eragrostis rigidior			m		-27°53'27.60''	32°12'36.00''
OQ302620	GFS_PHI_1132	Tetramesa sp. 26	South Africa: Phinda	Eragrostis rigidior			f		-27°53'27.60''	32°12'36.00''
OQ302621	GFS_PHI_1164F	Eurytomidae	South Africa: Phinda	Eragrostis rigidior			f		-27°53'27.60''	32°12'36.00''
OQ302622	GFS_PHI_1189M	Tetramesa sp. 18	South Africa: Phinda	Eragrostis gummiflua			m		-27°53'27.60''	32°12'36.00''
OQ302623	GFS_PHI_1190F	Tetramesa sp. 2	South Africa: Phinda	Sporobolus pyramidalis		2021	f		-27°53'27.60''	32°12'36.00''
OQ302624	GFS_PHI_1196F	Tetramesa sp. 10	South Africa: Hluhluwe Mine	Eragrostis trichophora			f		-28°01'58.80''	32°16'58.80''
OQ302625	GFS_PHI_1196M	Tetramesa sp. 11	South Africa: Hluhluwe Mine	Eragrostis trichophora			m		-28°01'58.80''	32°16'58.80''
OQ302626	GFS_PHI_1201F	Eurytomidae	South Africa: Phinda	Eragrostis rigidior			f		-27°53'27.60''	32°12'36.00''
OQ302627	GFS_PHI_1205F	Tetramesa sp. 26	South Africa: Phinda	Eragrostis rigidior			f		-27°53'27.60''	32°12'36.00''
OQ302628	GFS_PHI_1232F	Tetramesa sp. 26	South Africa: Phinda	Eragrostis rigidior			f		-27°53'27.60''	32°12'36.00''
OQ302629	GFS_PHI_1238F	Tetramesa sp. 5	South Africa: Coombs Valley, GHT	Eragrostis curvula			f		-33°16'48.00''	26°47'56.40''
OQ302630	GFS_PHI_1238M	Tetramesa sp. 11	South Africa: Hluhluwe Mine	Eragrostis trichophora			m		-28°01'58.80''	32°16'58.80''
OQ302631	GFS_PHI_1416F	Tetramesa sp. 26	South Africa: Phinda	Eragrostis rigidior			f		-27°53'27.60''	32°12'36.00''
OQ302632	GFS_PHI_1419F	Tetramesa sp. 18	South Africa: Phinda	Eragrostis gummiflua			f		-27°53'27.60''	32°12'36.00''
OQ302633	GFS_PHI_1436_2	Tetramesa sp. 2	South Africa: Phinda	Sporobolus pyramidalis		2021			-27°53'27.60''	32°12'36.00''
OQ302634	GFS_PHI_1447M	Tetramesa sp. 18	South Africa: Phinda	Eragrostis gummiflua			m		-27°53'27.60''	32°12'36.00''
OQ302635	GFS_PHI_1447	Tetramesa sp. 18	South Africa: Phinda	Eragrostis gummiflua			m		-27°53'27.60''	32°12'36.00''
OQ302636	KCP_2020_00175	Tetramesa sp. 20	South Africa: Kombuisland farm, Marquard	Eragrostis plana		2022	m		-28°46'08.40''	27°31'37.20''
OQ302637	KCP_2020_00177	Tetramesa sp. 23	South Africa: Kombuisland farm, Marquard	Eragrostis biflora		2022	m		-28°46'08.40''	27°31'37.20''
OQ302638	KCP_2020_00178	Tetramesa sp. 23	South Africa: Kombuisland farm, Marquard	Eragrostis biflora		2022	f		-28°46'08.40''	27°31'37.20''
OQ302639	KCP_2020_00184	Tetramesa sp. 18	South Africa: Kombuisland farm, Marquard	Eragrostis gummiflua			f		-28°45'21.60''	27°33'28.80''
OQ302640	KCP_2020_00185	Tetramesa sp. 18	South Africa: Kombuisland farm, Marquard	Eragrostis gummiflua		2022	f		-28°46'08.40''	27°31'37.20''
OQ302641	KCP_2020_00194	Tetramesa sp. 24	South Africa: Kombuisland farm, Marquard	Eragrostis capensis		2022	f		-28°46'08.40''	27°31'37.20''
OQ302642	KCP_2020_00199	Tetramesa sp. 25	South Africa: Kombuisland farm, Marquard	Eragrostis plana		2022	f		-28°46'08.40''	27°31'37.20''
OQ302643	KCP_2020_00201	Tetramesa sp. 25	South Africa: Kombuisland farm, Marquard	Eragrostis plana		2022	f		-28°46'08.40''	27°31'37.20''
OQ302644	KCP_2020_00207	Tetramesa sp. 25	South Africa: Kombuisland farm, Marquard	Eragrostis plana			f		-28°45'21.60''	27°33'28.80''
OQ302645	KCP_2020_00213	Tetramesa sp. 20	South Africa: Kombuisland farm, Marquard	Eragrostis plana		2022	f		-28°46'08.40''	27°31'37.20''
OQ302646	KCP_2020_00217	Tetramesa sp. 23	South Africa: Kombuisland farm, Marquard	Eragrostis biflora		2022	m		-28°46'08.40''	27°31'37.20''
OQ302647	KCP_2020_00219	Tetramesa sp. 17	South Africa: Kombuisland farm, Marquard	Eragrostis gummiflua		2022	m		-28°46'08.40''	27°31'37.20''
OQ302648	KCP_2020_00224	Tetramesa sp. 20	South Africa: Kombuisland farm, Marquard	Eragrostis plana		2022	f		-28°46'08.40''	27°31'37.20''
OQ302649	KCP_2020_00225	Tetramesa sp. 20	South Africa: Kombuisland farm, Marquard	Eragrostis plana			f		-28°45'21.60''	27°33'28.80''
OQ302650	KCP_2020_00235	Tetramesa sp. 18	South Africa: Kombuisland farm, Marquard	Eragrostis gummiflua		2022	m		-28°45'21.60''	27°33'28.80''
OQ302651	KCP_2020_00238	Tetramesa sp. 4	South Africa: Kombuisland farm, Marquard	Eragrostis curvula		2022	m		-28°45'21.60''	27°33'28.80''
OQ302652	KCP_2020_00239	Tetramesa sp. 24	South Africa: Kombuisland farm, Marquard	Eragrostis capensis		2022	f		-28°45'21.60''	27°33'28.80''
OQ302653	KCP_2020_00241	Tetramesa sp. 18	South Africa: Kombuisland farm, Marquard	Eragrostis gummiflua		2022	m		-28°45'21.60''	27°33'28.80''
OQ302654	KCP_2020_00242	Tetramesa sp. 5	South Africa: Kombuisland farm, Marquard	Eragrostis curvula		2022	f		-28°45'21.60''	27°33'28.80''
OQ302655	KCP_2020_00243	Tetramesa sp. 18	South Africa: Kombuisland farm, Marquard	Eragrostis gummiflua		2022	f		-28°45'21.60''	27°33'28.80''
OQ302656	KCP_2020_00244	Tetramesa sp. 5	South Africa: Kombuisland farm, Marquard	Eragrostis curvula		2022	f		-28°45'21.60''	27°33'28.80''
OQ302657	KCP_2020_00245	Tetramesa sp. 5	South Africa: Kombuisland farm, Marquard	Eragrostis curvula		2022	f		-28°45'21.60''	27°33'28.80''
OQ302658	KCP_2020_00247	Eurytomidae	South Africa	Phragmites mauritianus		2015	f		-27°37'19.20''	32°01'30.00''
OQ302659	LMY_2021_00110	Tetramesa sp. 5	South Africa: Mpumalanga	Eragrostis curvula		2022	m		-25°36'28.80''	31°06'00.00''
OQ302660	LMY_2021_00117	Tetramesa sp. 4	South Africa: Mpumalanga	Eragrostis curvula		2022			-25°36'28.80''	31°06'00.00''
OQ302661	LMY_2021_00125	Tetramesa sp. 5	South Africa: Mpumalanga	Eragrostis curvula		2022	f		-25°36'28.80''	31°06'00.00''
OQ302662	LMY_2021_00251	Tetramesa sp. 11	South Africa: Mpumalanga	Eragrostis trichophora		2022	m		-25°02'45.60''	31°05'56.40''
OQ302663	LMY_2021_00287	Tetramesa sp.5	South Africa: Mpumalanga	Eragrostis curvula		2022	f		-25°36'28.80''	31°06'00.00''
OQ302664	LMY_2021_00300	Tetramesa sp. 5	South Africa: Mpumalanga	Eragrostis curvula		2022	f		-25°36'28.80''	31°06'00.00''
OQ302665	LMY_2021_00308	Tetramesa sp. 4	South Africa: Mpumalanga	Eragrostis curvula		2022	f		-25°36'28.80''	31°06'00.00''
OQ302666	CVS0002	Tetramesa sp. 1	South Africa: Phinda	Sporobolus pyramidalis		2022			-27°53'27.60''	32°12'36.00''
OQ302667	GFS_PHI_1036	Tetramesa sp. 21	South Africa: Khuleni Powerlines, Hluhluwe	Panicum maximum		2022			-28°01'58.80''	32°16'58.80''
OQ302668	GFS_PHI_1040F	Tetramesa sp. 2	South Africa: Phinda	Sporobolus pyramidalis		2021	f		-27°53'27.60''	32°12'36.00''
OQ302669	GFS_PHI_1096F	Tetramesa sp. 2	South Africa: Phinda	Sporobolus pyramidalis		2021			-27°53'27.60''	32°12'36.00''
OQ302670	GFS_2021_00749	Tetramesa sp. 11	South Africa: Mkuze GR turn-off, Mkuze	Eragrostis trichophora		2021	m		-27°37'19.20''	32°01'30.00''
OQ302671	GFS_2021_00762	Tetramesa sp. 8	South Africa: Khuleni Powerlines, Hluhluwe	Cynodon dactylon		2021	m		-28°01'58.80''	32°16'58.80''
OQ302672	GFS_2021_00770	Tetramesa sp. 11	South Africa: Mkuze GR turn-off, Mkuze	Eragrostis trichophora		2021	f		-27°37'19.20''	32°01'30.00''
OQ302673	GFS_2020_0003	Tetramesa sp. 4	South Africa: Baakens River, Targetkloof, PE	Eragrostis curvula		2020			-33°58'08.40''	25°35'31.20''
OQ302674	GFS_2020_00054	Eurytomidae	South Africa: Baakens River, Targetkloof, PE	Eragrostis curvula		2020			-33°58'08.40''	25°35'31.20''
OQ302675	GFS_2020_00132	Tetramesa sp. 5	South Africa: Baakens River, Targetkloof, PE	Eragrostis curvula		2020			-33°58'08.40''	25°35'31.20''
OQ302676	GFS_2020_00196	Tetramesa sp. 5	South Africa: Glen Muir, EL	Eragrostis curvula		2020			-32°52'37.20''	28°05'42.00''
OQ302677	GFS_2020_00528	Tetramesa sp. 7	South Africa: Mondplaas	Hyparrhenia hirta		2020			-33°57'46.80''	24°57'14.40''
OQ302678	GFS_2020_00554	Tetramesa sp. 4	South Africa: Mondplaas	Eragrostis curvula		2020	m		-33°57'46.80''	24°57'14.40''
OQ302679	GFS_2020_00555	Tetramesa sp. 7	South Africa: Mondplaas	Hyparrhenia hirta		2020			-33°57'46.80''	24°57'14.40''
OQ302680	GFS_2020_00562	Tetramesa sp. 5	South Africa: Mondplaas	Eragrostis curvula		2020			-33°57'46.80''	24°57'14.40''
OQ302681	GFS_2020_00574	Tetramesa sp. 7	South Africa: Mondplaas	Hyparrhenia hirta		2020			-33°57'46.80''	24°57'14.40''
OQ302682	GFS_2020_00576	Tetramesa sp. 7	South Africa: Mondplaas	Hyparrhenia hirta		2020			-33°57'46.80''	24°57'14.40''
OQ302683	GFS_2020_00595	Tetramesa sp. 5	South Africa: Mondplaas	Eragrostis curvula		2020	m		-33°57'46.80''	24°57'14.40''
OQ302684	GFS_2020_00614	Tetramesa sp. 4	South Africa: Baakens River, Targetkloof, PE	Eragrostis curvula		2020			-33°58'08.40''	25°35'31.20''
OQ302685	GFS_2020_00626	Tetramesa sp. 7	South Africa: Mondplaas	Hyparrhenia hirta		2020			-33°57'46.80''	24°57'14.40''
OQ302686	GFS_2020_00638	Tetramesa sp. 5	South Africa: Glen Muir, EL	Eragrostis curvula		2020			-32°52'37.20''	28°05'42.00''
OQ302687	GFS_2020_00645	Tetramesa sp. 7	South Africa: Mondplaas	Hyparrhenia hirta		2020			-33°57'46.80''	24°57'14.40''
OQ302688	GFS_2020_00670	Tetramesa sp. 7	South Africa: Mondplaas	Hyparrhenia hirta		2020			-33°57'46.80''	24°57'14.40''
OQ302689	GFS_2020_00702	Tetramesa sp. 7	South Africa: Mondplaas	Hyparrhenia hirta		2020			-33°57'46.80''	24°57'14.40''
OQ302690	GFS_2020_00720	Tetramesa sp. 7	South Africa: Mondplaas	Hyparrhenia hirta		2020			-33°57'46.80''	24°57'14.40''
OQ302691	GFS_2020_00043	Tetramesa sp. 1	South Africa: Valhalla, EL	Sporobolus pyramidalis		2020			-32°52'19.20''	28°05'02.40''
OQ302692	GFS_2020_00087	Tetramesa sp. 4	South Africa: Baakens River, Targetkloof, PE	Eragrostis curvula		2020			-33°58'08.40''	25°35'31.20''
OQ302693	GFS_2021_00245	Tetramesa sp. 4	South Africa: Coombs Valley, GHT	Eragrostis curvula		2021		pre-pupa	-33°16'48.00''	26°47'56.40''
OQ302694	GFS_2021_00255	Tetramesa sp. 5	South Africa: Coombs Valley, GHT	Eragrostis curvula		2021		larva	-33°16'48.00''	26°47'56.40''
OQ302695	GFS_2021_00307	Tetramesa sp. 5	South Africa: Coombs Valley, GHT	Eragrostis curvula		2021		larva	-33°16'48.00''	26°47'56.40''
OQ302696	GFS_2021_00334	Tetramesa sp. 5	South Africa: Coombs Valley, GHT	Eragrostis curvula		2021		larva	-33°16'48.00''	26°47'56.40''
OQ302697	GFS_2021_00354	Tetramesa sp. 4	South Africa: Coombs Valley, GHT	Eragrostis curvula		2021	m		-33°16'48.00''	26°47'56.40''
OQ302698	GFS_2021_00373	Tetramesa sp. 4	South Africa: Coombs Valley, GHT	Eragrostis curvula		2021		larva	-33°16'48.00''	26°47'56.40''
OQ302699	GFS_2021_00374	Tetramesa sp. 5	South Africa: Coombs Valley, GHT	Eragrostis curvula		2021	f		-33°16'48.00''	26°47'56.40''
OQ302700	GFS_2021_00411	Tetramesa sp. 5	South Africa: Coombs Valley, GHT	Eragrostis curvula		2021		larva	-33°16'48.00''	26°47'56.40''
OQ302701	GFS_2021_00726	Tetramesa sp. 11	South Africa: Mkuze GR turn-off, Mkuze	Eragrostis trichophora		2021	f		-27°37'19.20''	32°01'30.00''
OQ302702	GFS_2021_00730	Tetramesa sp. 10	South Africa: Mkuze GR turn-off, Mkuze	Eragrostis trichophora		2021	f		-27°37'19.20''	32°01'30.00''
OQ302703	GFS_2021_00746	Tetramesa sp. 14	South Africa: Khuleni Powerlines, Hluhluwe	Eragrostis superba		2021	f		-28°01'58.80''	32°16'58.80''
OQ302704	GFS_2021_00773	Tetramesa sp. 10	South Africa: Khuleni Powerlines, Hluhluwe	Eragrostis trichophora		2021	f		-28°01'58.80''	32°16'58.80''
OQ302705	GFS_2021_00786	Tetramesa sp. 14	South Africa: Khuleni Powerlines, Hluhluwe	Eragrostis superba		2021	f		-28°01'58.80''	32°16'58.80''
OQ302706	GFS_2021_00806	Tetramesa sp. 11	South Africa: Mkuze GR turn-off, Mkuze	Eragrostis trichophora		2021	m		-27°37'19.20''	32°01'30.00''
OQ302707	GFS_2021_00810	Tetramesa sp. 10	South Africa: Mkuze GR turn-off, Mkuze	Eragrostis trichophora		2021	f		-27°37'19.20''	32°01'30.00''
OQ302708	GFS_2021_00826	Tetramesa sp. 14	South Africa: Khuleni Powerlines, Hluhluwe	Eragrostis superba		2021	f		-28°01'58.80''	32°16'58.80''
OQ302709	GFS_2021_00846	Tetramesa sp. 10	South Africa: Mkuze GR turn-off, Mkuze	Eragrostis trichophora		2021	f		-27°37'19.20''	32°01'30.00''
OQ302710	GFS_2021_00853	Tetramesa sp. 14	South Africa: Khuleni Powerlines, Hluhluwe	Eragrostis superba		2021	f		-28°01'58.80''	32°16'58.80''
OQ302711	GFS_2021_00883	Tetramesa sp. 10	South Africa: Mkuze GR turn-off, Mkuze	Eragrostis trichophora		2021	m		-27°37'19.20''	32°01'30.00''
OQ302712	GFS_2021_00886	Tetramesa sp. 9	South Africa: Khuleni Powerlines, Hluhluwe	Cynodon dactylon		2021	f		-28°01'58.80''	32°16'58.80''
OQ302713	GFS_2021_00887	Tetramesa sp. 13	South Africa: Khuleni Powerlines, Hluhluwe	Eragrostis superba		2021	f		-28°01'58.80''	32°16'58.80''
OQ302714	GFS_2021_00894	Tetramesa sp. 9	South Africa: Khuleni Powerlines, Hluhluwe	Cynodon dactylon		2021	m		-28°01'58.80''	32°16'58.80''
OQ302715	GFS_2021_00901	Tetramesa sp. 12	South Africa: Drummond, Durban	Eustachys paspaloides		2021	f		-29°45'43.20''	30°41'31.20''
OQ302716	GFS_2021_00902	Tetramesa sp. 10	South Africa: Mkuze GR turn-off, Mkuze	Eragrostis trichophora		2021	m		-27°37'19.20''	32°01'30.00''
OQ302717	KCP_2011_00169	Tetramesa romana	South Africa: Bethlehem area	Arundo dox		2021			-28°25'55.20''	28°00'46.80''
OQ302718	KCP_2011_00173	Tetramesa romana	South Africa: Bethlehem area	Arundo dox		2021			-28°24'03.60''	27°15'10.80''
OQ302719	KCP_2012_00170	Tetramesa romana	South Africa: Bethlehem area	Arundo dox		2022			-28°30'39.60''	27°18'07.20''
OQ302720	KCP_2012_00172	Tetramesa romana	South Africa: Bethlehem area	Arundo dox		2022			-28°25'15.60''	27°15'50.40''
OQ302721	KCP_2020_00012	Tetramesa sp. 4	South Africa: Rietspruit area	Eragrostis curvula		2020	f		-28°27'07.20''	27°19'58.80''
OQ302722	KCP_2020_00019	Tetramesa sp. 4	South Africa: Rietspruit area	Eragrostis curvula		2020	f		-28°23'42.00''	27°15'43.20''
OQ302723	KCP_2020_00032	Tetramesa sp. 4	South Africa: Rietspruit area	Eragrostis curvula		2020	m		-28°23'42.00''	27°15'43.20''
OQ302724	KCP_2020_00033	Tetramesa sp. 5	South Africa: Rietspruit area	Eragrostis curvula		2020	f		-28°23'42.00''	27°15'43.20''
OQ302725	KCP_2020_00036	Tetramesa sp. 4	South Africa: Rietspruit area	Eragrostis curvula		2020	f		-28°27'07.20''	27°19'55.20''
OQ302726	KCP_2020_00037	Tetramesa sp 5	South Africa: Rietspruit area	Eragrostis curvula		2020	m		-28°27'07.20''	27°19'58.80''
OQ302727	KCP_2020_00039	Tetramesa sp. 5	South Africa: Rietspruit area	Eragrostis curvula		2020	m		-28°27'07.20''	27°19'58.80''
OQ302728	KCP_2020_00040	Tetramesa sp. 20	South Africa: Rietspruit area	Eragrostis plana		2020	m		-28°27'03.60''	27°20'06.00''
OQ302729	KCP_2020_00041	Tetramesa sp. 5	South Africa: Rietspruit area	Eragrostis curvula		2020	m		-28°27'07.20''	27°19'58.80''
OQ302730	KCP_2020_00044	Tetramesa sp. 4	South Africa: Rietspruit area	Eragrostis curvula		2020	f		-28°27'07.20''	27°19'55.20''
OQ302731	KCP_2020_00045	Tetramesa sp. 4	South Africa: Rietspruit area	Eragrostis curvula		2020	m		-28°27'07.20''	27°19'55.20''
OQ302732	KCP_2020_00047	Tetramesa sp. 20	South Africa: Rietspruit area	Eragrostis plana		2020	m		-28°27'03.60''	27°20'06.00''
OQ302733	KCP_2020_00048	Tetramesa sp. 4	South Africa: Rietspruit area	Eragrostis curvula		2020	m		-28°27'07.20''	27°19'58.80''
OQ302734	KCP_2020_00052	Tetramesa sp. 4	South Africa: Rietspruit area	Eragrostis curvula		2020	f		-28°27'07.20''	27°19'55.20''
OQ302735	KCP_2020_00054	Tetramesa sp. 20	South Africa: Rietspruit area	Eragrostis plana		2020	f		-28°27'03.60''	27°20'06.00''
OQ302736	KCP_2020_00055	Tetramesa sp. 4	South Africa: Rietspruit area	Eragrostis curvula		2020	f		-28°23'42.00''	27°15'43.20''
OQ302737	KCP_2020_00061	Tetramesa sp. 4	South Africa: Rietspruit area	Eragrostis curvula		2020	f		-28°23'42.00''	27°15'43.20''
OQ302738	KCP_2020_00062	Tetramesa sp. 4	South Africa: Rietspruit area	Eragrostis curvula		2020	f		-28°27'07.20''	27°19'58.80''
OQ302739	KCP_2020_00063	Tetramesa sp. 20	South Africa: Rietspruit area	Eragrostis plana		2020	m		-28°27'03.60''	27°20'06.00''
OQ302740	KCP_2020_00075	Tetramesa sp. 16	South Africa: Rietspruit area	Eragrostis tef		2021	f		-28°26'02.40''	27°21'14.40''
OQ302741	KCP_2020_00076	Tetramesa sp. 16	South Africa: Rietspruit area	Eragrostis tef		2021	f		-28°26'02.40''	27°21'14.40''
OQ302742	KCP_2020_00077	Tetramesa sp. 16	South Africa: Rietspruit area	Eragrostis tef		2021	m		-28°26'02.40''	27°21'14.40''
OQ302743	KCP_2020_00079	Tetramesa sp. 16	South Africa: Rietspruit area	Eragrostis tef		2021	f		-28°26'02.40''	27°21'14.40''
OQ302744	KCP_2020_00085	Tetramesa sp. 18	South Africa: Rietspruit area	Eragrostis gummiflua		2021	m		-28°26'31.20''	27°21'43.20''
OQ302745	KCP_2020_00089	Tetramesa sp. 18	South Africa: Rietspruit area	Eragrostis gummiflua		2021	f		-28°26'31.20''	27°21'43.20''
OQ302746	KCP_2020_00090	Tetramesa sp. 18	South Africa: Rietspruit area	Eragrostis gummiflua		2021	f		-28°26'31.20''	27°21'43.20''
OQ302747	KCP_2020_00092	Tetramesa sp. 17	South Africa: Rietspruit area	Eragrostis gummiflua		2021	f		-28°26'31.20''	27°21'43.20''
OQ302748	KCP_2020_00096	Tetramesa sp. 19	South Africa: Rietspruit area	Eragrostis lehmannia		2021	f		-28°26'31.20''	27°21'43.20''
OQ302749	KCP_2020_00140	Tetramesa sp. 18	South Africa: Rietspruit area	Eragrostis gummiflua		2021	m		-28°26'31.20''	27°21'43.20''
OQ302750	SPY_KZN_62	Tetramesa sp. 2	South Africa: Westwood Mall, Durban	Sporobolus pyramidalis		2017			-29°49'44.40''	30°57'03.60''
OQ302751	GFS_2021_00741	Tetramesa sp. 9	South Africa: Khuleni Powerlines, Hluhluwe	Cynodon dactylon		2021	f		-28°01'58.80''	32°16'58.80''
ADDED GENBANK SEQUENCES
AY317223	IOZ 020003	Bruchophagus ononis	China: Fanjing Mt.,Guizhou								Chen et al. 2004
AY317226	IOZ 010002	Bruchophagus sp1	China: Riwoqê Tibet								Chen et al. 2004
AY317239	ROM 905047	Bruchophagus sp2	Guyana: Rupununi district: Kurupukari								Chen et al. 2004
AY317227	IOZ 990001	Bruchophagus gibbus	China: Dayao Mt., Guangxi								Chen et al. 2004
AY317233	IOZ 010003	Eurytoma orchidearum	China: Kangding, Sichuan								Chen et al. 2004
AY317225	IOZ 010004	Eurytoma verticillata	China: Baoxing, Sichuan								Chen et al. 2004
AY317236	IOZ 010005	Eurytoma sp. 2	China: Riwoqê, Tibet								Chen et al. 2004
AY317224	IOZ 980001	Eurytoma sp. 3	China: Tianmu Mt., Zhejiang								Chen et al. 2004
AY317235	ROM 905032	Isosomodes gigantenus	Guyana: Mazaruni-Potaro district: Amatuk fall								Chen et al. 2004
AY317238	ROM 920116	Phylloxeroxenus phylloxerae	Indonesia: East of Kalimantan, Kutai								Chen et al. 2004
AY317228	IOZ 990002	Plutarchia indefensa	China: Dayao Mt., Guangxi								Chen et al. 2004
AY317222	IOZ 200001	Plutarchia sp.	China: Napo, Guangxi								Chen et al. 2004
AY317232	IOZ 020008	Sycophila concinna	China: Fanjing Mt., Guizhou								Chen et al. 2004
AY317230	IOZ 020009	Sycophila taprobanica	China: Fanjing Mt., Guizhou								Chen et al. 2004
AY317231	IOZ 020010	Sycophila sp. 1	China: Xinhe, Xinjiang								Chen et al. 2004
AY317234	IOZ 200002	Sycophila variegata	China: Napo, Guangxi								Chen et al. 2004
AY317242	ROM 920118	Tenuipetiolus medicaginis	Indonesia: East of Kalimantan, Kutai								Chen et al. 2004
AY317229	IOZ 990003	Tetramesa bambusae	China: Liuba, Shaanxi								Chen et al. 2004
AY317243	ROM 905018	Neorileya meridionalis	Guyana: Mazaruni-Potaro District: Kaieteur fall								Chen et al. 2004
AY317240	IOZ 020006	Megastigmus dorsalis	China: Fanjing Mt.,Guizhou								Chen et al. 2004
AY317241	IOZ 020007	Monodontomerus minor	China: Fanjing Mt.,Guizhou								Chen et al. 2004
AY317221	IOZ 020002	Brachymeria lasus	China: Fanjing Mt.,Guizhou								Chen et al. 2004
MH878935	GDEL1626	Bruchophagus sp. 2									Unpublished
MH878926	GDEL1616	Bruchophagus sp. 2									Unpublished
KC960021	GDEL1029	Bruchophagus gibbus									Delavare et al. 2014
MG340126	BIOUG22728-C12	Bruchophagus gibbus									Unpublished
JQ756607	GDEL1288	Bruchophagus caucasicus									Cruaud et al. 2013
AMTPA1154-15	BC-ZSM-HYM-24067-B02	Tetramesa sp.	Germany: Bavaria						47°23'31.20''	10°22'15.60''	Unpublished
AMTPA462-15	BC-ZSM-HYM-24059-G10	Tetramesa sp.	Germany: Bavaria						47°23'16.80''	10°20'38.40''	Unpublished
AMTPA674-15	BC-ZSM-HYM-24062-A09	Tetramesa sp.	Germany: Bavaria						47°23'13.20''	10°20'38.40''	Unpublished
AMTPA706-15	BC-ZSM-HYM-24062-D05	Tetramesa sp.	Germany: Bavaria						47°23'31.20''	10°20'27.60''	Unpublished
AMTPA707-15	BC-ZSM-HYM-24062-D06	Tetramesa sp.	Germany: Bavaria						47°23'31.20''	10°20'27.60''	Unpublished
AMTPA898-15	BC-ZSM-HYM-24064-D07	Tetramesa sp.	Germany: Bavaria						47°23'16.80''	10°20'38.40''	Unpublished
AMTPA899-15	BC-ZSM-HYM-24064-D08	Tetramesa sp.	Germany: Bavaria						47°23'16.80''	10°20'38.40''	Unpublished
AMTPB1039-15	BC-ZSM-HYM-24115-H05	Tetramesa sp.	Germany: Bavaria						47°23'31.20''	10°20'27.60''	Unpublished
AMTPB1043-15	BC-ZSM-HYM-24115-H09	Tetramesa sp.	Germany: Bavaria						47°23'31.20''	10°20'27.60''	Unpublished
AMTPB1252-15	BC-ZSM-HYM-24118-B05	Tetramesa sp.	Germany: Bavaria						47°23'16.80''	10°20'38.40''	Unpublished
AMTPB1254-15	BC-ZSM-HYM-24118-B07	Tetramesa sp.	Germany: Bavaria						47°23'16.80''	10°20'38.40''	Unpublished
AMTPB151-15	BC-ZSM-HYM-24106-E08	Tetramesa sp.	Germany: Bavaria						47°23'38.40''	10°21'57.60''	Unpublished
KR416842	BIOUG11906-B01	Tetramesa sp.	Canada: Quebec, Forillon NP						48°51'25.20''	-64°22'33.60''	Unpublished
GMGMP2393-18	BIOUG42677-C06	Tetramesa sp.	Germany: Bavaria						48°09'54.00''	11°29'06.00''	Unpublished
GMGMP7221-18	BIOUG42916-B01	Tetramesa sp.	Germany: Bavaria						48°09'54.00''	11°29'06.00''	Unpublished
GMGMT1030-20	BIOUG55106-G08	Tetramesa sp.	Germany: Bavaria						48°09'54.00''	11°29'06.00''	Unpublished
OPPEC4539-17	BIOUG33331-G01	Tetramesa sp.	Canada, Ontario, Owen Sound						44°38'01.32''	-80°41'53.88''	Unpublished
OPPFM1893-17	BIOUG34713-F07	Tetramesa sp.	Canada, Ontario, Windsor						42°15'46.08''	-83°04'21.00''	Unpublished
OPPFM3406-17	BIOUG34781-C07	Tetramesa sp.	Canada, Ontario, Windsor						42°15'46.08''	-83°04'21.00''	Unpublished
OPPFM520-17	BIOUG34699-B12	Tetramesa sp.	Canada, Ontario, Windsor						42°15'46.08''	-83°04'21.00''	Unpublished
KR408765	BIOUG10641-H10	Tetramesa sp.	Canada: Ontario, Georgian Bay Islands NP						44°44'30.48''	-79°51'00.36''	Unpublished
KR405666	BIOUG10613-H05	Tetramesa sp.	Canada: Ontario, Georgian Bay Islands NP						44°44'30.48''	-79°51'00.36''	Unpublished
KR402173	BIOUG10613-D11	Tetramesa sp.	Canada: Ontario, Georgian Bay Islands NP						44°44'30.48''	-79°51'00.36''	Unpublished
MG344135	BIOUG05588-G03	Tetramesa sp.	Canada: Ontario, Burlington						43°19'55.20''	-79°50'24.00''	Unpublished
MG344033	BIOUG31750-F03	Tetramesa sp.	Canada: Ontario, Guelph						43°31'07.32''	-80°10'15.24''	Unpublished
MG340113	BIOUG21916-E07	Tetramesa sp.	Canada: Ontario, Scarborough, Woburn						43°46'39.00''	-79°13'36.48''	Unpublished
MG339825	BIOUG00786-G04	Tetramesa sp.	Canada: Ontario, Wellington County						43°32'13.20''	-80°08'02.40''	Unpublished
MG335372	BIOUG21953-D02	Tetramesa sp.	Canada: Ontario, Toronto						43°41'23.28''	-79°31'52.32''	Unpublished
MG334647	BIOUG31770-F09	Tetramesa sp.	Canada: Ontario, Guelph						43°31'07.32''	-80°10'15.24''	Unpublished
MG339505	BIOUG21911-C05	Tetramesa sp.	Canada: Ontario, Toronto, Zion Heights						43°47'52.80''	-79°22'12.00''	Unpublished
MF903065	BIOUG03191-A06	Tetramesa sp.	Canada: Alberta, Elk Island NP						53°41'06.00''	-112°51'36.00''	Unpublished
KR800436	BIOUG03349-F04	Tetramesa sp.	Canada: Manitoba, Riding Mountain NP						50°40'33.60''	-99°53'52.80''	Unpublished
KR799792	10BBCHY-1098	Tetramesa sp.	Canada: Saskatchewan, Prince Albert NP						53°54'18.00''	-106°04'26.40''	Unpublished
KU496847	KNWR 5327	Tetramesa sp.	USA: Alaska, Kenai Peninsula						60°35'02.40''	-150°40'55.20''	Unpublished
